# Supplementary material
Source: PubMed Central journal article supplement (PMC3416375)
Supplement: supp_78.14.4763_AEM00477-12_supplemental.pdf [file supp_78.14.4763_AEM00477-12_supplemental.pdf]

## Supplemental materials

**TABLE S1** Composition of the carbohydrate-free defined medium

| Component                                           | Concentration (mg/L) |
|-----------------------------------------------------|----------------------|
| K <sub>2</sub> HPO <sub>4</sub>                     | 7000                 |
| NaH <sub>2</sub> PO <sub>4</sub> -1H <sub>2</sub> O | 2000                 |
| (NH <sub>4</sub> ) <sub>2</sub> SO <sub>4</sub>     | 1000                 |
| FeCl <sub>3</sub> -6H <sub>2</sub> O                | 128                  |
| MgSO <sub>4</sub> -7H <sub>2</sub> O                | 500                  |
| Thiamine                                            | 1                    |
| Nicotinic acid                                      | 1.2                  |
| Calcium pantothenate                                | 0.25                 |
| Biotin                                              | 0.005                |
| L-Alanine                                           | 60                   |
| L-Arginine                                          | 50                   |
| L-Aspartic acid                                     | 90                   |
| L-Cystine                                           | 20                   |
| L-Glutamic acid                                     | 100                  |
| Glycine                                             | 50                   |
| L-Histidine                                         | 20                   |
| L-Isoleucine                                        | 30                   |
| L-Leucine                                           | 90                   |
| L-Lysine                                            | 50                   |
| L-Methionine                                        | 10                   |
| L-Phenylalanine                                     | 40                   |
| L-Proline                                           | 10                   |
| L-Serine                                            | 30                   |
| L-Threonine                                         | 30                   |
| L-Tryptophan                                        | 10                   |
| L-Tyrosine                                          | 50                   |
| L-Valine                                            | 80                   |

Defined *Staphylococcus aureus* media from (11).

**TABLE S2** Regression parameters of growth models for *Staphylococcus* isolates grown in carbohydrate-free media

| Treatment     | Parameter | <i>S. epidermidis</i> |                     | <i>S. aureus</i> |                     |
|---------------|-----------|-----------------------|---------------------|------------------|---------------------|
|               |           | Estimate              | Confidence interval | Estimate         | Confidence interval |
| Media alone   | <i>B</i>  | -0.8                  | (-0.9, -0.7)        | -1.3             | (-1.6, -1.0)        |
|               | <i>C</i>  | 4.4                   | (4.2, 4.6)          | 4.6              | (4.4, 4.8)          |
|               | <i>I</i>  | 9.3                   | (8.4, 10.3)         | 4.7              | (4.1, 5.3)          |
|               | <i>D</i>  |                       |                     | 9.7              | (9.1, 10.3)         |
| Glucose       | <i>B</i>  | -1.5                  | (-1.6, -1.3)        | -1.5             | (-1.8, -1.1)        |
|               | <i>C</i>  | 4.6                   | (4.4, 4.8)          | 4.6              | (4.4, 4.9)          |
|               | <i>I</i>  | 8.1                   | (7.5, 8.8)          | 4.9              | (4.3, 5.4)          |
|               | <i>D</i>  |                       |                     | 10.1             | (9.5, 10.7)         |
| Lactose       | <i>B</i>  | -1.3                  | (-1.5, -1.2)        | -1.6             | (-2.0, -1.2)        |
|               | <i>C</i>  | 4.3                   | (4.1, 4.6)          | 4.6              | (4.4, 4.8)          |
|               | <i>I</i>  | 7.0                   | (6.2, 7.7)          | 4.8              | (4.3, 5.3)          |
|               | <i>D</i>  |                       |                     | 9.8              | (9.3, 10.3)         |
| HMO           | <i>B</i>  | -1.1                  | (-1.2, -1.0)        | -1.6             | (-1.9, -1.4)        |
|               | <i>C</i>  | 4.1                   | (3.9, 4.4)          | 4.5              | (4.4, 4.6)          |
|               | <i>I</i>  | 4.3                   | (3.9, 4.8)          | 3.3              | (3.2, 3.5)          |
|               | <i>D</i>  |                       |                     | 9.5              | (9.3, 9.7)          |
| HMO + Glucose | <i>B</i>  | -1.5                  | (-1.6, -1.4)        | -1.9             | (-2.2, -1.6)        |
|               | <i>C</i>  | 4.5                   | (4.3, 4.7)          | 4.7              | (4.5, 4.8)          |
|               | <i>I</i>  | 5.0                   | (4.7, 5.3)          | 3.4              | (3.2, 3.6)          |
|               | <i>D</i>  |                       |                     | 9.5              | (9.3, 9.7)          |
| HMO + Lactose | <i>B</i>  | -1.5                  | (-1.6, -1.4)        | -1.9             | (-2.2, -1.7)        |
|               | <i>C</i>  | 4.5                   | (4.3, 4.7)          | 4.6              | (4.5, 4.8)          |
|               | <i>I</i>  | 4.9                   | (4.6, 5.2)          | 3.3              | (3.2, 3.5)          |
|               | <i>D</i>  |                       |                     | 9.5              | (9.3, 9.6)          |

\*All parameter estimates were significantly different from zero ( $P < 0.0001$ )

**TABLE S3** Regression parameters of growth models for *Staphylococcus* isolates grown in tryptic soy broth (TSB)

| Treatment           | Parameter | <i>S. epidermidis</i> |                     | <i>S. aureus</i> |                     |
|---------------------|-----------|-----------------------|---------------------|------------------|---------------------|
|                     |           | Estimate              | Confidence interval | Estimate         | Confidence interval |
| TSB alone           | <i>B</i>  | -1.7                  | (-2.1, -1.4)        | -4.0             | (-4.3, -3.7)        |
|                     | <i>C</i>  | 4.4                   | (4.2, 4.6)          | 4.6              | (4.5, 4.6)          |
|                     | <i>I</i>  | 5.0                   | (4.7, 5.4)          | 4.3              | (4.2, 4.3)          |
|                     | <i>D</i>  | 10.0                  | (9.7, 10.3)         | 9.4              | (9.3, 9.4)          |
| Glucose + TSB       | <i>B</i>  | -1.7                  | (-2.1, -1.4)        | -3.5             | (-3.8, -3.2)        |
|                     | <i>C</i>  | 4.4                   | (4.2, 4.7)          | 4.6              | (4.5, 4.6)          |
|                     | <i>I</i>  | 4.8                   | (4.7, 5.2)          | 4.2              | (4.2, 4.3)          |
|                     | <i>D</i>  | 9.9                   | (9.6, 10.3)         | 9.4              | (9.4, 9.5)          |
| HMO + TSB           | <i>B</i>  | -1.8                  | (-2.1, -1.5)        | -4.4             | (-5.2, -3.6)        |
|                     | <i>C</i>  | 4.4                   | (4.3, 4.6)          | 4.6              | (4.5, 4.7)          |
|                     | <i>I</i>  | 4.7                   | (4.4, 4.9)          | 4.0              | (3.9, 4.1)          |
|                     | <i>D</i>  | 9.8                   | (9.6, 10.1)         | 9.4              | (9.3, 9.4)          |
| HMO + Glucose + TSB | <i>B</i>  | -1.9                  | (-2.2, -1.6)        | -4.3             | (-5.0, -3.6)        |
|                     | <i>C</i>  | 4.5                   | (4.3, 4.6)          | 4.5              | (4.5, 4.6)          |
|                     | <i>I</i>  | 4.5                   | (4.3, 4.7)          | 4.0              | (3.9, 4.0)          |
|                     | <i>D</i>  | 9.8                   | (9.5, 10.0)         | 9.4              | (9.3, 9.4)          |

\*All parameter estimates were significantly different from zero ( $P < 0.0001$ )

**TABLE S4** Regression parameters of growth models for *Staphylococcus* isolates grown in HMO-free infant formula

| Treatment     | Parameter | <i>S. epidermidis</i> |                     | <i>S. aureus</i> |                     |
|---------------|-----------|-----------------------|---------------------|------------------|---------------------|
|               |           | Estimate              | Confidence interval | Estimate         | Confidence interval |
| Formula alone | <i>M</i>  | 7.77                  | (7.68, 7.85)        | 7.59             | (7.53, 7.65)        |
|               | <i>B</i>  | 0.27                  | (0.26, 0.29)        | 0.36             | (0.34, 0.38)        |
|               | <i>C</i>  | 4.47                  | (4.33, 4.62)        | 4.66             | (4.55, 4.77)        |
|               | <i>L</i>  | 3.14                  | (2.93, 3.35)        | 2.65             | (2.49, 2.80)        |
| HMO + Formula | <i>M</i>  | 8.51**                | (8.42, 8.60)        | 8.43**           | (8.37, 8.49)        |
|               | <i>B</i>  | 0.24**                | (0.23, 0.26)        | 0.29**           | (0.28, 0.30)        |
|               | <i>C</i>  | 4.51                  | (4.37, 4.66)        | 4.61             | (4.51, 4.72)        |
|               | <i>L</i>  | 3.09                  | (2.90, 3.28)        | 2.73             | (2.59, 2.86)        |

\*All parameter estimates were significantly different from zero ( $P < 0.0001$ ).

\*\* Parameter estimate differed significantly from the negative control ( $P < 0.0001$ ).

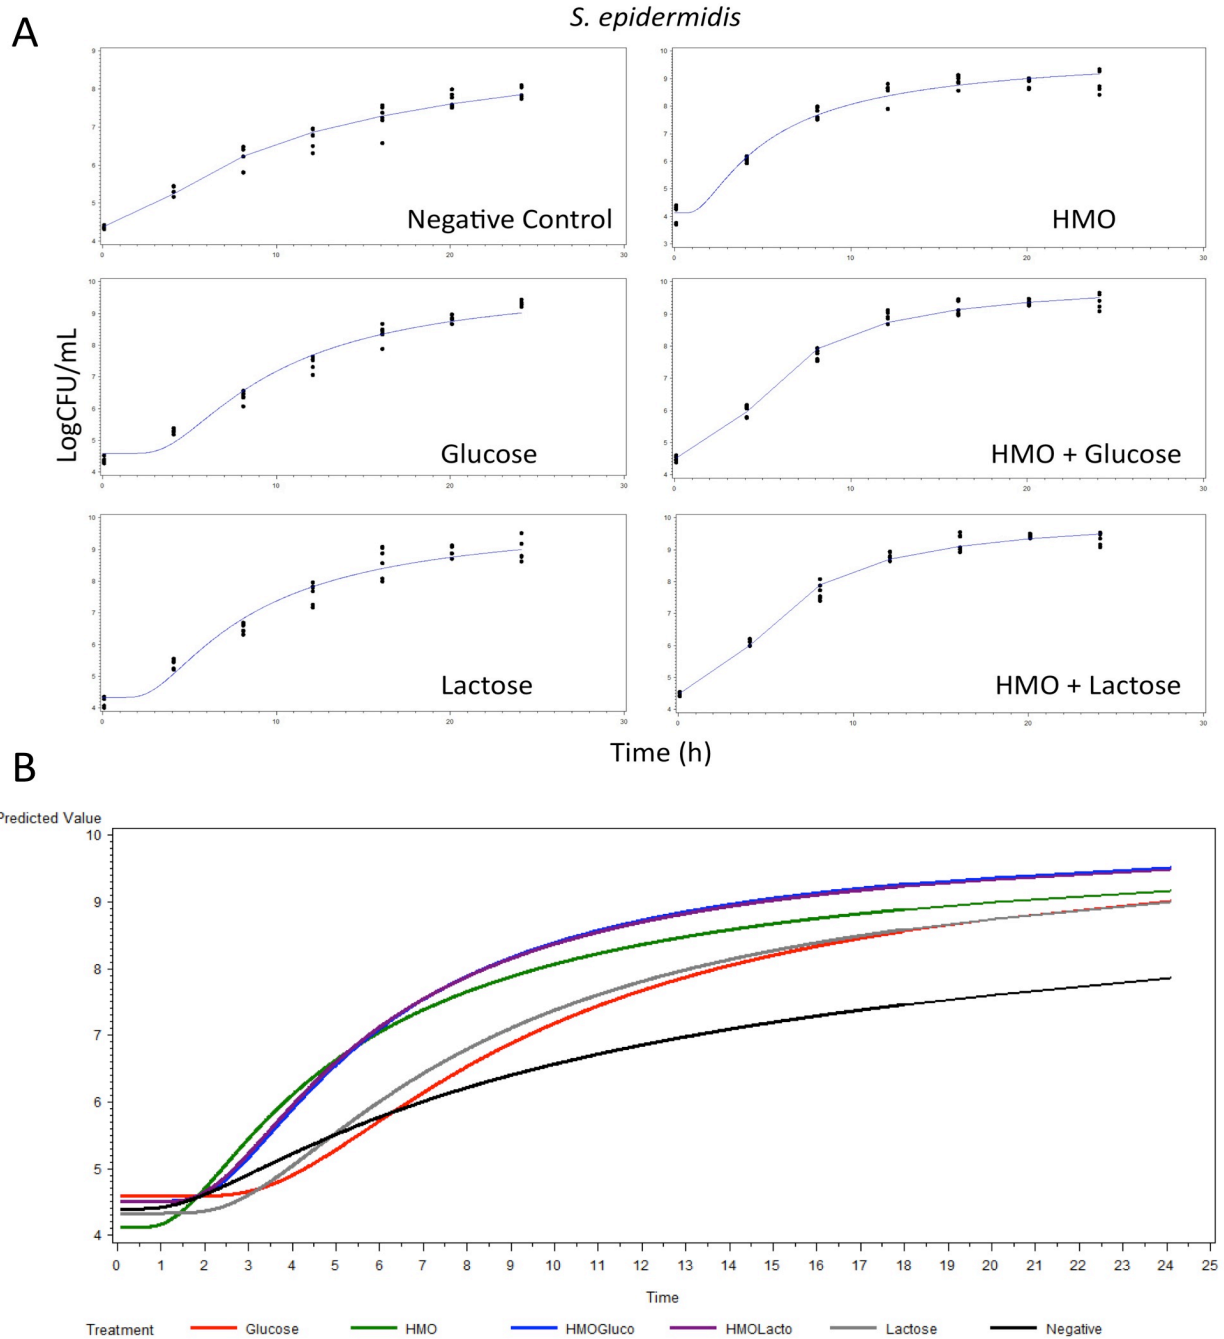

**FIG S1** For the growth of the *S. epidermidis* isolate in carbohydrate-free media: A) estimated regression lines and observed data points for each carbohydrate treatment, and B) full model comparison of regression lines for all treatments. Carbohydrate treatments were added to the media at a concentration of 10 g/L ( $n = 6$ ).

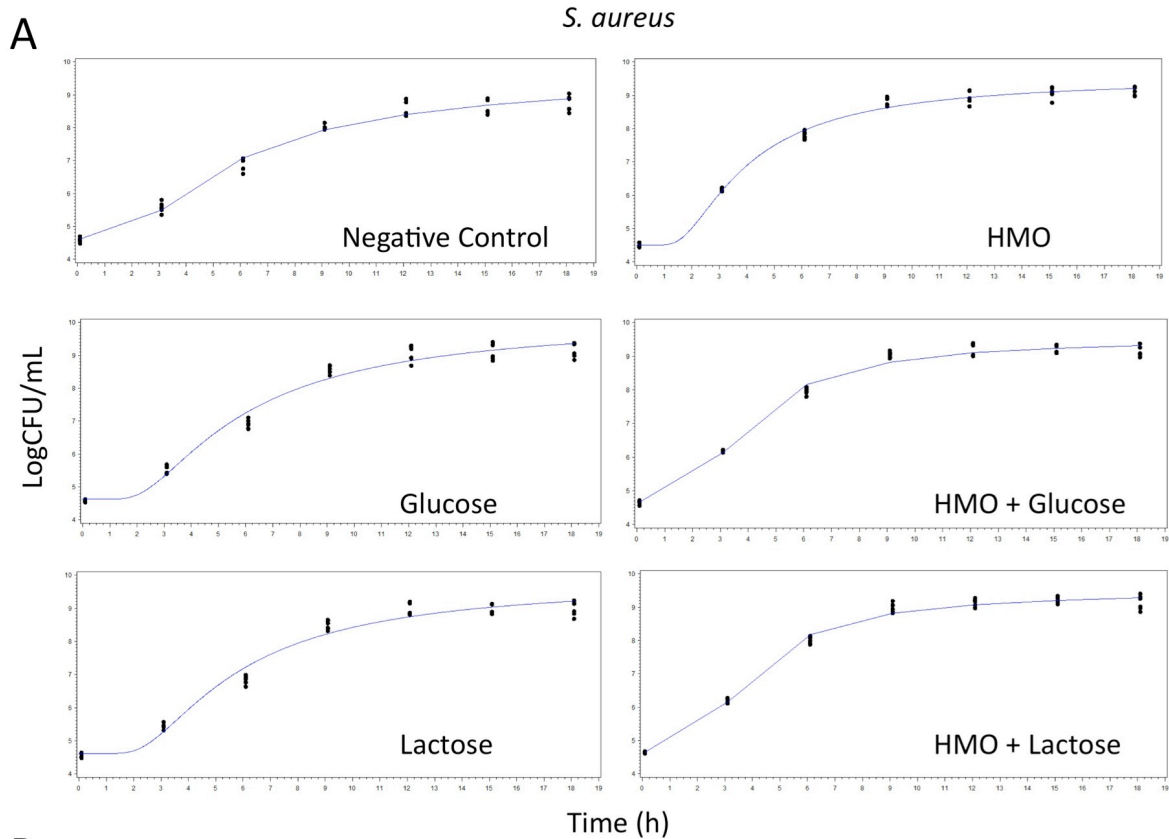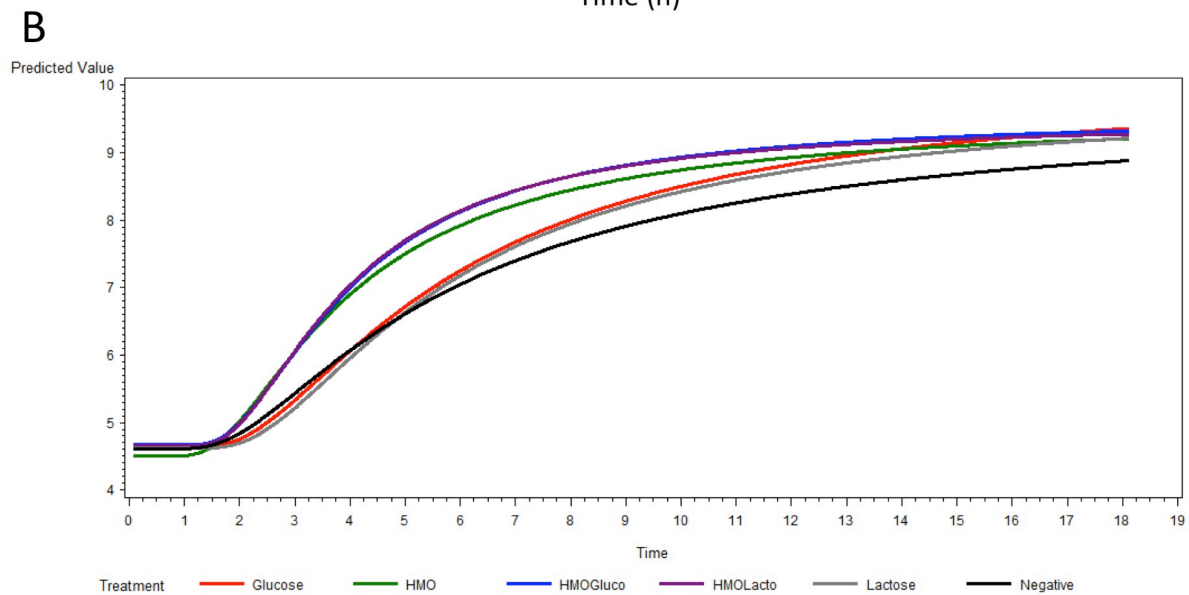

**FIG S2** For the growth of the *S. aureus* isolate in carbohydrate-free media: A) estimated regression lines and observed data points for each carbohydrate treatment, and B) full model comparison of regression lines for all treatments. Carbohydrate treatments were added to the media at a concentration of 10 g/L ( $n = 6$ ).

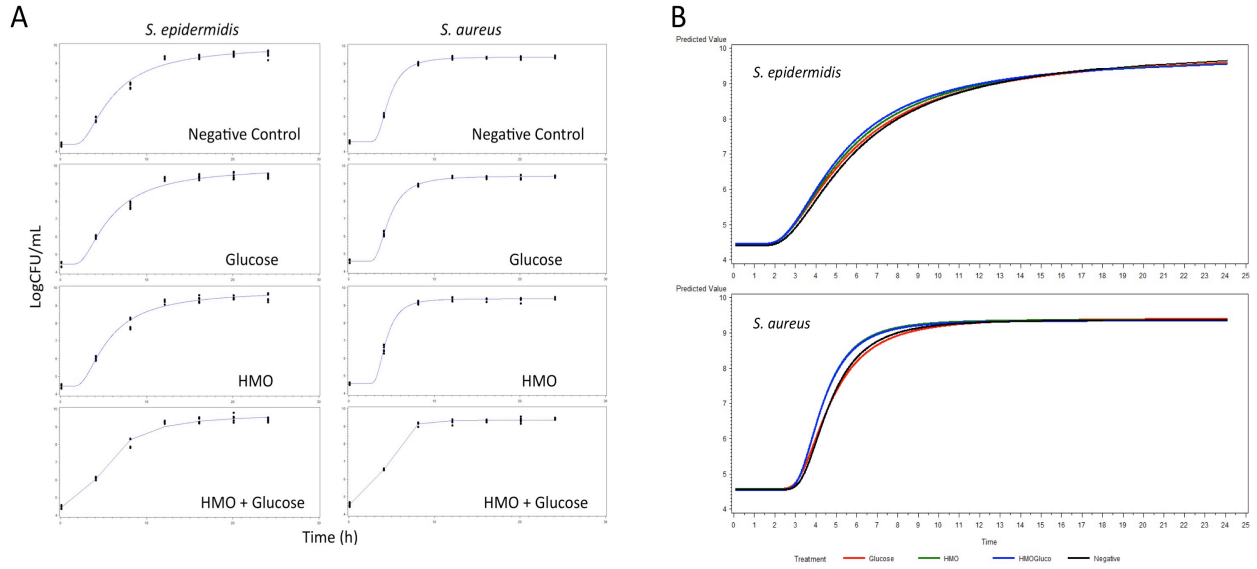

**FIG S3** For *Staphylococcus* isolates grown in tryptic soy broth (TSB): A) estimated regression lines and observed data points for each carbohydrate treatment, and B) full model comparison of regression lines for all treatments. Carbohydrate treatments were added to the media at a concentration of 10 g/L. ( $n = 3$ ).

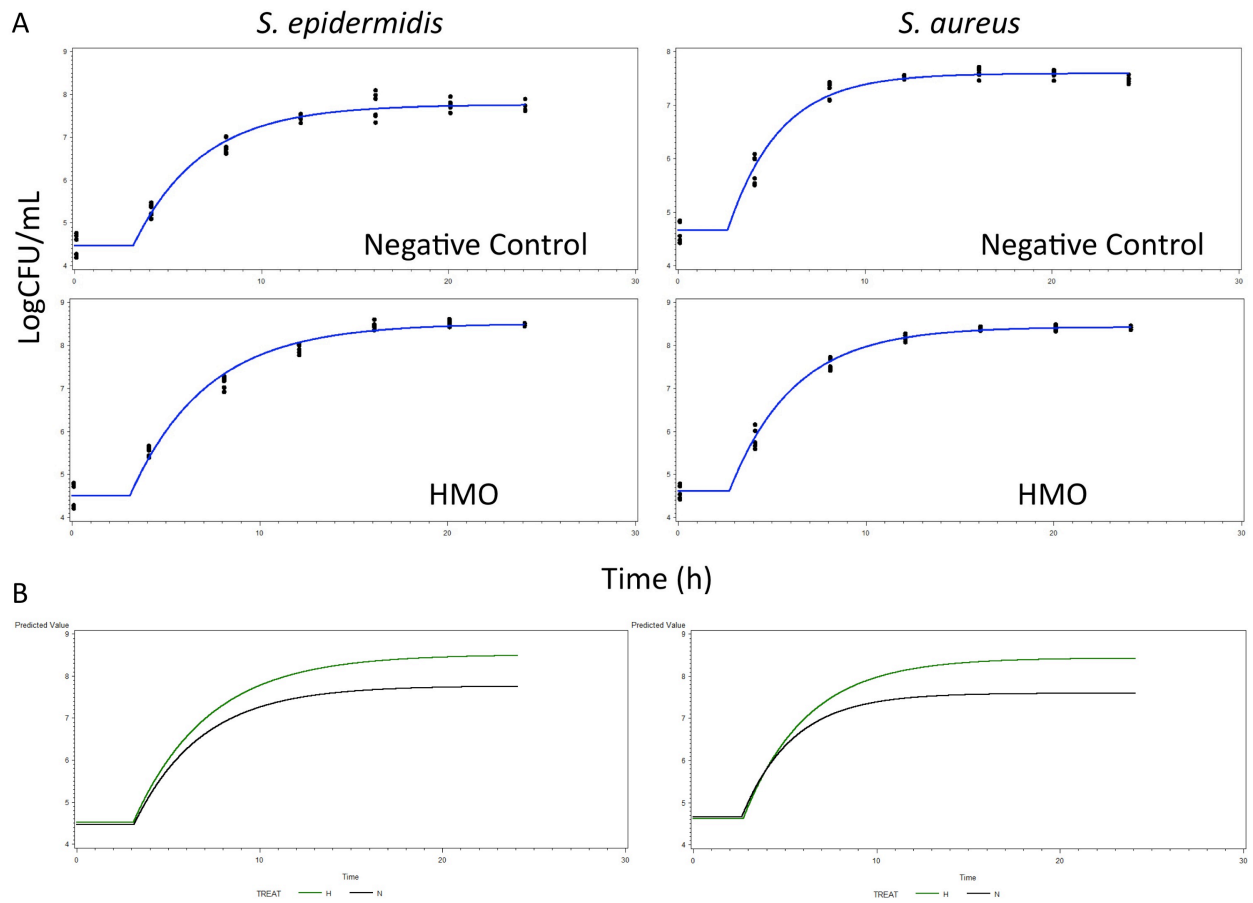

**FIG S4** For *Staphylococcus* isolates grown in HMO-free infant formula without or with added HMO (10 g/L): A) estimated regression lines and observed data points for both treatments, and B) full model comparison of regression lines for both treatments. ( $n = 6$ ).
